# Supplementary material for: Healthcare utilization in children across the care continuum during the COVID-19 pandemic
Source: PubMed Central journal article supplement (PMC9612476; doi:10.1371/journal.pone.0276461), 2022-10-27
Supplement: pone.0276461.s001.pdf [file pone.0276461.s001.pdf]

**Supplementary Table 1:** Demographic trends comparing early and mid-pandemic to pre-pandemic periods

|                                              | Early Pandemic*                     |         | Mid-Pandemic*                       |          |
|----------------------------------------------|-------------------------------------|---------|-------------------------------------|----------|
|                                              | Change in % of pediatric Optum pop. | P-value | Change in % of pediatric Optum pop. | P-value  |
| <b>Female sex</b>                            | 0.0% [-0.0%, 0.0%]                  | 0.1     | 0% [-0.0%, 0.0%]                    | 0.32     |
| <b>Age (years)</b>                           |                                     |         |                                     |          |
| < 1                                          | 0.0% [-0.1%, 0.0%]                  | 0.4     | -0.1% [-0.1%, -0.0%]                | 0.02     |
| 1 – 5                                        | -0.3% [-0.4%, -0.1%]                | 0.0001  | -0.3% [-0.5%, -0.1%]                | 0.003    |
| 6 – 12                                       | 0.1% [-0.0%, 0.1%]                  | 0.05    | 0.1% [0.0%, 0.2%]                   | 0.01     |
| 13 – 17                                      | 0.3% [0.1%, 0.4%]                   | 0.005   | 0.3% [0.0%, 0.5%]                   | 0.03     |
| <b>Race/Ethnicity (removing unknown)</b>     |                                     |         |                                     |          |
| non-Hispanic White                           | 0.1% [-0.1%, 0.4%]                  | 0.3     | 0.2% [-0.2%, 0.5%]                  | 0.32     |
| non-Hispanic Black                           | 0.0% [-0.2%, 0.1%]                  | 0.83    | 0.0% [-0.2%, 0.2%]                  | 0.95     |
| Hispanic                                     | 0.1% [-0.0%, 0.2%]                  | 0.05    | 0.0% [-0.2%, 0.1%]                  | 0.73     |
| Asian                                        | -0.2% [-0.4%, -0.1%]                | 0.0002  | -0.1% [-0.3%, 0.0%]                 | 0.11     |
| <b>Census Region</b>                         |                                     |         |                                     |          |
| New England                                  | -0.1% [-0.2%, -0.0%]                | 0.01    | -0.1% [-0.2%, 0.0%]                 | 0.19     |
| Middle Atlantic                              | -0.1% [-0.2%, -0.0%]                | 0.01    | -0.2% [-0.4%, -0.1%]                | 0.004    |
| East North Central                           | 1.1% [0.6%, 1.6%]                   | 0.005   | 1.1% [0.5%, 1.7%]                   | 0.0001   |
| West North Central                           | -0.2% [-0.4%, 0.0%]                 | 0.11    | -0.6% [-1.0%, -0.2%]                | 0.004    |
| South Atlantic                               | -1.0% [-1.5%, -0.5%]                | 0.0001  | -0.7% [-1.4%, -0.1%]                | 0.03     |
| East South Central                           | -0.1% [-0.1%, -0.0%]                | 0.002   | 0.1% [0.0%, 0.2%]                   | 0.01     |
| West South Central                           | 0.6% [-0.9%, 2.0%]                  | 0.44    | 0.6% [-1.2%, 2.3%]                  | 0.53     |
| Mountain                                     | -0.1% [-0.5%, 0.2%]                 | 0.39    | -0.3% [-0.7%, 0.1%]                 | 0.1      |
| Pacific                                      | 0.7% [0.3%, 1.1%]                   | 0.001   | 1.2% [0.6%, 1.8%]                   | < 0.0001 |
| <b>Income quartile (of patient zip code)</b> |                                     |         |                                     |          |
| Lowest (< \$55,019)                          | -0.2% [-0.5%, 0.1%]                 | 0.24    | -0.5% [-0.9%, -0.1%]                | 0.03     |
| Second (\$55,020 - \$72,759)                 | 0.1% [0.0%, 0.2%]                   | 0.02    | 0.0% [-0.2%, 0.1%]                  | 0.61     |
| Third (\$72,759 - \$96,969)                  | 0.1% [0.0%, 0.3%]                   | 0.01    | 0.3% [0.2%, 0.4%]                   | < 0.0001 |
| Highest (> \$96,969)                         | 0.0% [-0.3%, 0.2%]                  | 0.73    | 0.2% [-0.2%, 0.6%]                  | 0.26     |

\*Changes calculated using an interrupted time series approach; Early pandemic = mid-March 2020 – mid-June 2020 and Mid-pandemic = mid-June 2020 through March 2021

**Supplementary Figure 1:** Trends in race/ethnicity over time, with horizontal dotted lines representing the start of the early and mid-pandemic periods

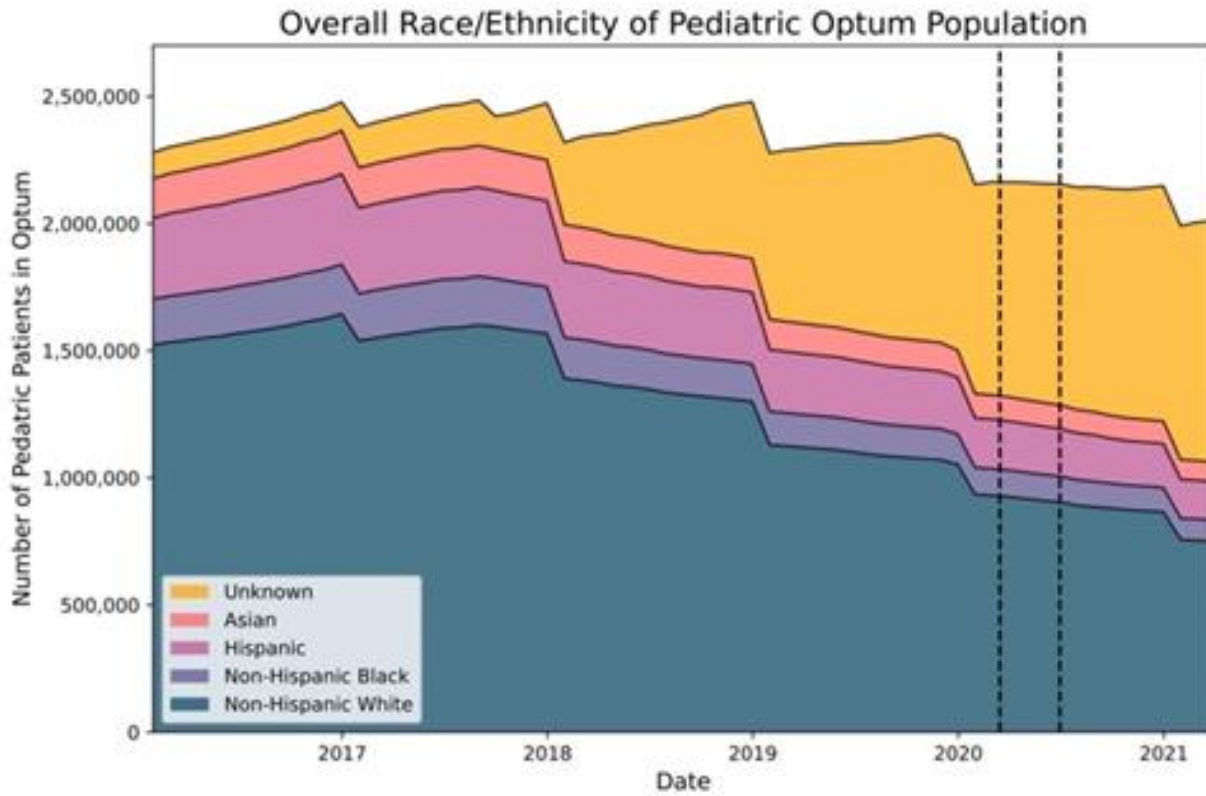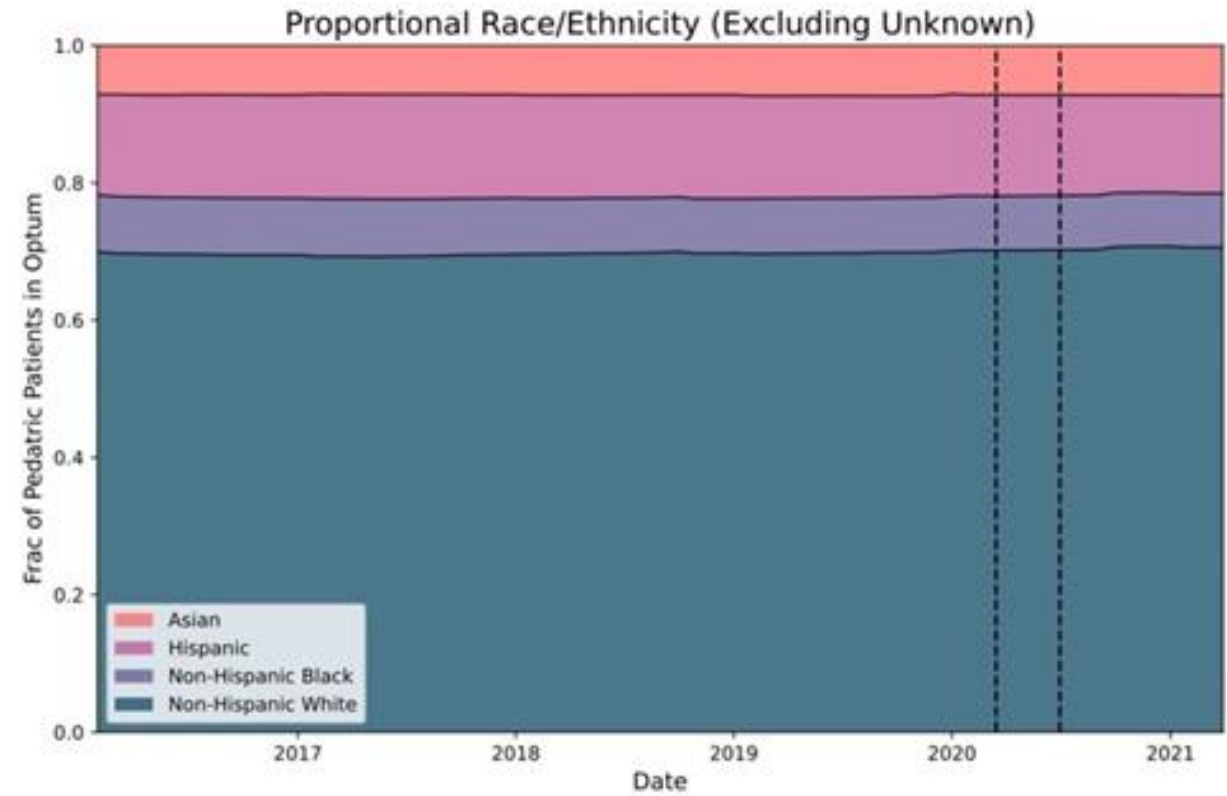

**Supplementary Figure 2:** Trends in pre-pandemic top 7 causes of hospitalization in non-psychiatric facilities, with dotted lines representing starts of early and mid-pandemic periods

### Hospitalizations

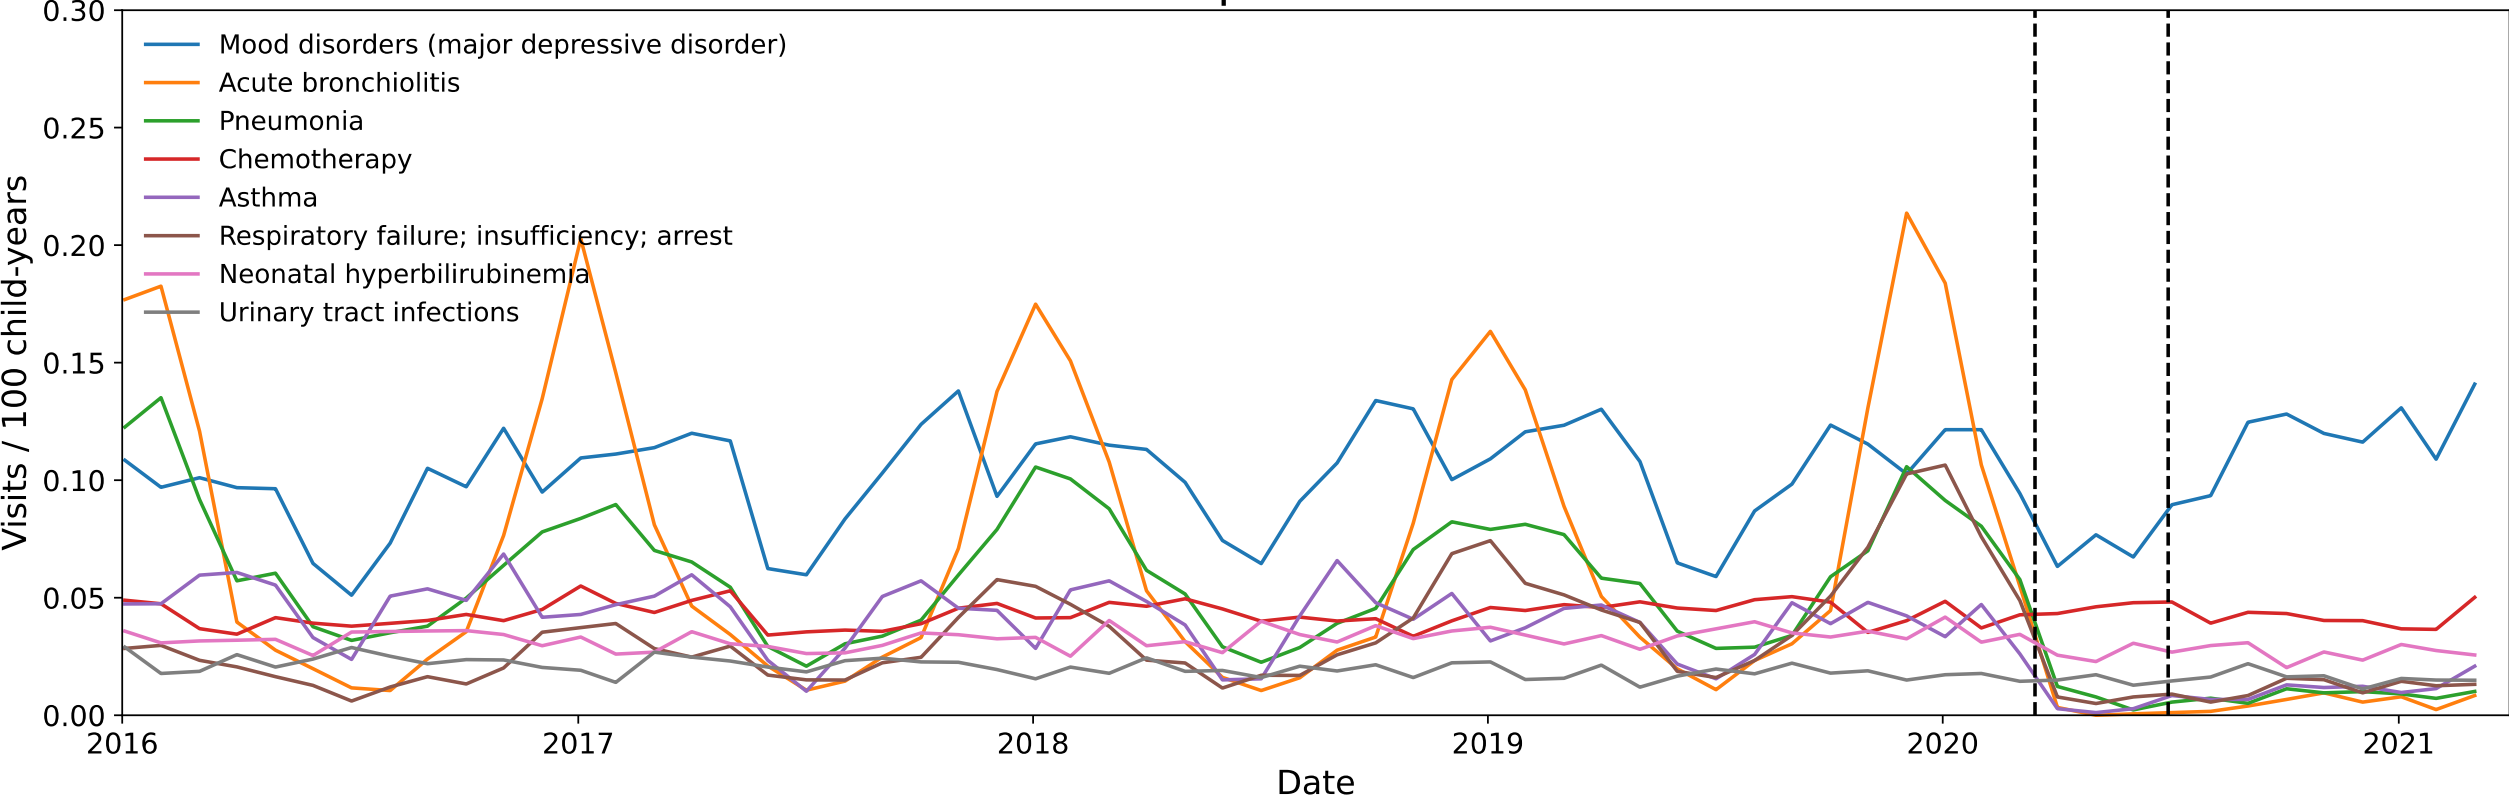

**Supplementary Figure 3: Pandemic changes in leading causes of PCP sick visits with heat map**

| Diagnosis                                                   | Rank Pre-Pandemic | Rank Post-Pandemic | % Change during early pandemic* | % Change during mid-pandemic* |
|-------------------------------------------------------------|-------------------|--------------------|---------------------------------|-------------------------------|
| Streptococcal sore throat                                   | 1                 | 3                  | -84.8% [-87.8% , -81.1%]        | -66.1% [-72.0% , -58.9%]      |
| Otitis media                                                | 2                 | 6                  | -85.2% [-88.1% , -81.6%]        | -76.9% [-82.5% , -69.3%]      |
| Acute upper respiratory infection                           | 3                 | 5                  | -91.1% [-94.2% , -86.6%]        | -71.3% [-77.6% , -63.4%]      |
| Viral infection                                             | 4                 | 9                  | -68.8% [-73.7% , -63.1%]        | -58.7% [-66.5% , -49.2%]      |
| Fever of unknown origin                                     | 5                 | 8                  | -63.0% [-69.4% , -55.3%]        | -57.0% [-72.1% , -33.7%]      |
| Attention-deficit hyperactivity disorder                    | 6                 | 2                  | -26.7% [-28.4% , -24.9%]        | -16.3% [-20.6% , -11.8%]      |
| Cough                                                       | 7                 | 12                 | -75.8% [-81.3% , -68.8%]        | -65.7% [-72.1% , -57.8%]      |
| Allergic reactions                                          | 8                 | 7                  | -25.7% [-30.7% , -20.4%]        | -12.8% [-18.2% , -6.9%]       |
| Acute sinusitis                                             | 9                 | 30                 | -88.4% [-92.2% , -82.9%]        | -78.5% [-82.3% , -73.9%]      |
| Medical examination/evaluation                              | 10                | 4                  | -50.7% [-57.1% , -43.4%]        | -12.9% [-19.2% , -6.2%]       |
| Inflammation; infection of eye (except caused by TB or STD) | 11                | 24                 | -74.2% [-76.2% , -72.0%]        | -68.4% [-73.4% , -62.6%]      |
| Influenza                                                   | 12                | 113                | -98.3% [-99.1% , -96.9%]        | -97.6% [-99.4% , -90.7%]      |
| Asthma                                                      | 13                | 21                 | -61.0% [-66.6% , -54.4%]        | -59.0% [-65.0% , -52.0%]      |
| Other ear and sense organ disorders                         | 14                | 10                 | -33.9% [-39.0% , -28.3%]        | -18.3% [-35.4% , 3.3%]        |
| Allergic rhinitis                                           | 15                | 17                 | -66.4% [-70.5% , -61.7%]        | -30.3% [-38.7% , -20.6%]      |
| Cellulitis                                                  | 16                | 14                 | -26.1% [-29.0% , -23.0%]        | -26.1% [-30.4% , -21.6%]      |
| Abdominal pain                                              | 17                | 16                 | -58.2% [-63.7% , -51.9%]        | -18.9% [-26.1% , -10.9%]      |
| Common cold                                                 | 18                | 45                 | -91.5% [-94.4% , -86.9%]        | -69.9% [-76.8% , -61.0%]      |
| Croup                                                       | 19                | 53                 | -94.5% [-96.6% , -91.1%]        | -81.8% [-87.4% , -73.8%]      |
| Feeding difficulties and mismanagement                      | 20                | 13                 | -16.5% [-19.2% , -13.7%]        | -10.9% [-16.0% , -5.5%]       |
| Other upper respiratory disease                             | 21                | 22                 | -79.2% [-83.0% , -74.6%]        | -33.8% [-47.4% , -16.5%]      |
| Genitourinary symptoms and ill-defined conditions           | 22                | 18                 | -28.8% [-32.8% , -24.6%]        | -4.5% [-12.0% , 3.7%]         |
| Other injuries and conditions due to external causes        | 23                | 25                 | -58.4% [-62.3% , -54.0%]        | -26.5% [-36.1% , -15.5%]      |
| Other aftercare                                             | 24                | 23                 | -51.5% [-53.7% , -49.2%]        | -42.3% [-46.7% , -37.6%]      |
| Other skin disorders                                        | 25                | 19                 | -28.4% [-35.1% , -21.2%]        | -5.2% [-16.5% , 7.5%]         |
| Rashes                                                      | 26                | 20                 | -28.5% [-33.5% , -23.2%]        | -20.8% [-25.3% , -16.1%]      |
| Other non-traumatic joint disorders                         | 27                | 27                 | -71.8% [-75.9% , -67.1%]        | -27.2% [-36.4% , -16.7%]      |
| Pneumonia                                                   | 28                | 99                 | -92.4% [-95.3% , -87.8%]        | -96.4% [-97.1% , -95.5%]      |
| Acute bronchiolitis                                         | 29                | 97                 | -94.0% [-96.3% , -90.3%]        | -92.9% [-94.9% , -90.2%]      |
| Superficial injury; contusion                               | 30                | 29                 | -40.1% [-44.9% , -34.9%]        | -20.4% [-28.8% , -11.0%]      |
| Headache; including migraine                                | 32                | 28                 | -62.1% [-66.3% , -57.4%]        | -15.6% [-22.8% , -7.6%]       |
| Immunizations and screening for infectious disease          | 34                | 1                  | 36.9% [1.1% , 85.4%]            | 501.3% [397.0% , 627.5%]      |
| Anxiety disorders                                           | 37                | 15                 | -22.1% [-25.7% , -18.3%]        | 1.8% [-5.7% , 9.8%]           |
| Constipation                                                | 39                | 26                 | -34.7% [-41.5% , -27.2%]        | -2.4% [-12.3% , 8.7%]         |
| Viral Infection (COVID-19)                                  | -                 | 11                 | N/A                             |                               |

\*Changes calculated using an interrupted time series approach; Early pandemic = mid-March 2020 – mid-June 2020 and Mid-pandemic = mid-June 2020 through March 2021

**Supplementary Figure 4: Pandemic changes in leading causes of ED visits with heat map**

| Diagnosis                                                       | Rank Pre-Pandemic | Rank Post-Pandemic | % Change during early pandemic* | % Change during mid-pandemic* |
|-----------------------------------------------------------------|-------------------|--------------------|---------------------------------|-------------------------------|
| Open wounds of head; neck; and trunk                            | 1                 | 1                  | -26.1% [-33.8% , -17.5%]        | -15.8% [-20.8% , -10.6%]      |
| Superficial injury; contusion                                   | 2                 | 3                  | -58.3% [-64.2% , -51.5%]        | -32.6% [-40.7% , -23.5%]      |
| Abdominal pain                                                  | 3                 | 5                  | -65.3% [-69.8% , -60.1%]        | -39.5% [-45.0% , -33.4%]      |
| Sprains and strains                                             | 4                 | 8                  | -74.5% [-78.9% , -69.2%]        | -37.6% [-44.4% , -30.0%]      |
| Fracture of upper limb                                          | 5                 | 2                  | -45.6% [-51.8% , -38.6%]        | -21.8% [-29.5% , -13.3%]      |
| Fever of unknown origin                                         | 6                 | 9                  | -70.2% [-73.8% , -66.2%]        | -66.8% [-75.8% , -54.4%]      |
| Acute upper respiratory infection                               | 7                 | 19                 | -88.0% [-91.8% , -82.2%]        | -75.3% [-81.2% , -67.6%]      |
| Otitis media                                                    | 8                 | 29                 | -84.4% [-86.5% , -82.1%]        | -75.4% [-82.7% , -65.2%]      |
| Streptococcal sore throat                                       | 9                 | 22                 | -75.7% [-79.7% , -70.9%]        | -62.0% [-71.2% , -49.9%]      |
| Other bone disease and musculoskeletal deformities              | 10                | 7                  | -54.5% [-60.1% , -48.2%]        | -30.4% [-39.4% , -20.0%]      |
| Nausea and vomiting                                             | 11                | 20                 | -82.9% [-85.6% , -79.7%]        | -61.5% [-68.6% , -52.8%]      |
| Open wounds of extremities                                      | 12                | 6                  | -7.9% [-18.2% , 3.6%]           | -2.7% [-11.4% , 6.7%]         |
| Other injuries and conditions due to external causes            | 13                | 10                 | -64.7% [-69.2% , -59.5%]        | -41.4% [-47.2% , -35.0%]      |
| Allergic reactions                                              | 14                | 13                 | -66.2% [-71.6% , -59.7%]        | -37.4% [-43.2% , -31.1%]      |
| Spondylosis; intervertebral disc disorders; other back problems | 15                | 11                 | -59.0% [-62.6% , -55.0%]        | -25.3% [-30.6% , -19.6%]      |
| Viral infection                                                 | 16                | 21                 | -76.9% [-80.4% , -72.6%]        | -66.0% [-72.6% , -57.9%]      |
| Head injury, unspecified                                        | 17                | 14                 | -61.2% [-65.5% , -56.4%]        | -35.4% [-42.6% , -27.3%]      |
| Croup                                                           | 18                | 38                 | -93.9% [-95.8% , -91.2%]        | -77.1% [-83.9% , -67.4%]      |
| Asthma                                                          | 19                | 34                 | -85.6% [-88.3% , -82.3%]        | -68.8% [-74.0% , -62.6%]      |
| Influenza                                                       | 20                | 121                | -98.0% [-99.1% , -95.6%]        | -98.1% [-99.7% , -88.1%]      |
| Headache; including migraine                                    | 21                | 23                 | -70.8% [-74.5% , -66.6%]        | -40.8% [-47.9% , -32.7%]      |
| Acute bronchiolitis                                             | 22                | 68                 | -93.6% [-95.4% , -91.1%]        | -92.1% [-94.9% , -87.8%]      |
| Other non-traumatic joint disorders                             | 23                | 17                 | -73.7% [-78.3% , -68.1%]        | -45.4% [-51.3% , -38.7%]      |
| Pneumonia                                                       | 24                | 56                 | -86.1% [-90.8% , -79.2%]        | -90.1% [-92.9% , -86.1%]      |
| Cellulitis                                                      | 25                | 30                 | -48.4% [-53.8% , -42.3%]        | -39.8% [-45.6% , -33.4%]      |
| Constipation                                                    | 26                | 24                 | -55.2% [-65.9% , -41.2%]        | -30.2% [-39.2% , -20.0%]      |
| Concussion w or w/o loss of consciousness                       | 27                | 32                 | -67.8% [-71.9% , -63.1%]        | -37.2% [-48.6% , -23.3%]      |
| Urinary tract infections                                        | 28                | 25                 | -42.9% [-48.4% , -36.8%]        | -21.6% [-28.1% , -14.6%]      |
| Other connective tissue disease                                 | 29                | 26                 | -63.8% [-70.6% , -55.4%]        | -43.3% [-50.5% , -35.1%]      |
| Fracture of lower limb                                          | 30                | 18                 | -35.9% [-42.1% , -29.0%]        | -13.0% [-21.9% , -3.0%]       |
| Medical examination/evaluation                                  | 31                | 15                 | -57.1% [-70.6% , -37.5%]        | 1.0% [-32.8% , 52.0%]         |
| Joint disorders and dislocations; trauma-related                | 32                | 27                 | -42.4% [-47.1% , -37.1%]        | -16.8% [-24.0% , -9.0%]       |
| Suicide and intentional self-inflicted injury                   | 33                | 16                 | -45.4% [-50.7% , -39.4%]        | 5.6% [-8.7% , 22.1%]          |
| Mood disorders (major depressive disorder)                      | 35                | 28                 | -50.2% [-58.9% , -39.7%]        | -8.7% [-22.6% , 7.7%]         |
| Immunizations and screening for infectious diseases             | 43                | 4                  | 112.6% [16.4% , 288.4%]         | 372.9% [113.3% , 948.2%]      |
| Viral Infection (COVID-19)                                      | -                 | 12                 | N/A                             | N/A                           |

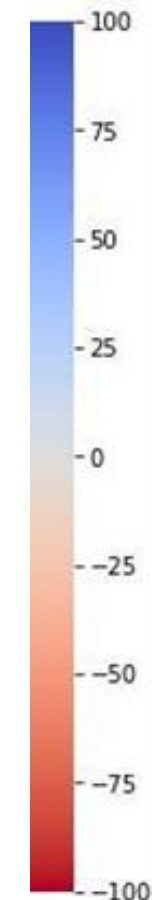

\*Changes calculated using an interrupted time series approach; Early pandemic = mid-March 2020 – mid-June 2020 and Mid-pandemic = mid-June 2020 through March 2021

**Supplementary Figure 5:** Trends in telehealth visits over time, with dotted lines representing starts of early and mid-pandemic periods

### Telehealth

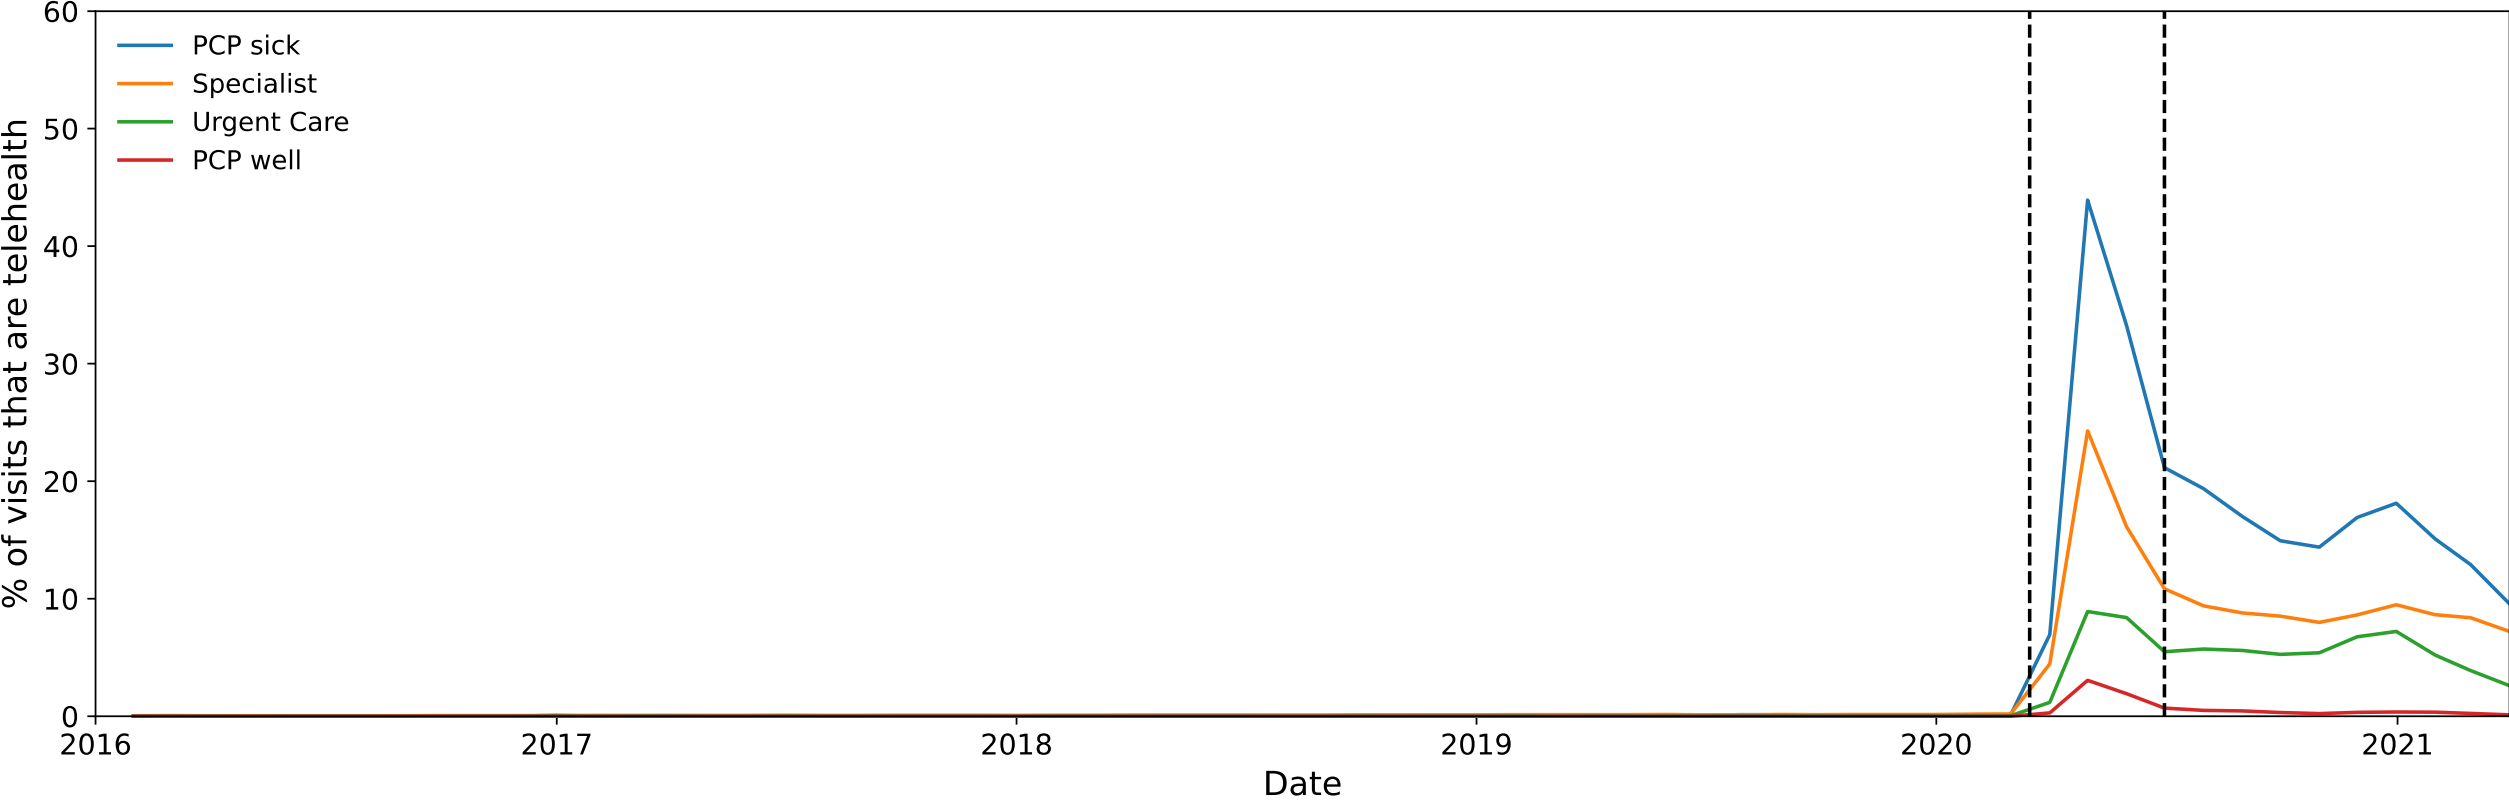



**Supplementary Figure 6:** Sensitivity analysis portraying pandemic changes in healthcare utilization with adjustment for age, sex, race, census region, and income quartile

| Feature                             | Pre-pandemic count / 100 child-years | % change during early pandemic 3/15/20 – 6/15/20 | % change during mid- pandemic 6/15/20 – 4/1/21 |
|-------------------------------------|--------------------------------------|--------------------------------------------------|------------------------------------------------|
| PCP well visit                      | 95.6                                 | -41.5% [-49.3% , -32.4%]                         | -7.5% [-15.5% , 1.3%]                          |
| PCP sick visit                      | 165.0                                | -63.1% [-66.1% , -59.8%]                         | -39.1% [-46.6% , -30.5%]                       |
| ED                                  | 39.4                                 | -61.4% [-66.3% , -55.9%]                         | -37.9% [-46.3% , -28.3%]                       |
| Urgent Care                         | 20.1                                 | -78.7% [-82.3% , -74.4%]                         | -37.0% [-47.5% , -24.4%]                       |
| Specialist                          | 156.1                                | -46.5% [-51.1% , -41.4%]                         | -20.1% [-24.8% , -15.1%]                       |
| Hospitalizations                    | 1.3                                  | -45.2% [-51.1% , -38.5%]                         | -26.3% [-35.6% , -15.7%]                       |
| with ICU                            | 0.3                                  | -45.4% [-51.2% , -38.8%]                         | -29.1% [-39.4% , -17.1%]                       |
| without ICU                         | 1.1                                  | -45.1% [-51.4% , -38.1%]                         | -25.7% [-35.1% , -15.1%]                       |
| Admission to Psychiatric facilities | 0.4                                  | -42.4% [-47.1% , -37.3%]                         | -16.1% [-22.5% , -9.1%]                        |
| Prescriptions                       | 288.9                                | -37.8% [-42.0% , -33.3%]                         | -25.9% [-33.6% , -17.3%]                       |
| first time                          | 226.2                                | -47.7% [-51.8% , -43.3%]                         | -30.5% [-39.2% , -20.5%]                       |
| refills                             | 62.7                                 | -3.2% [-11.8% , 6.4%]                            | -12.7% [-18.2% , -6.8%]                        |
